# Supplementary material
Source: PubMed Central journal article supplement (PMC3752506)
Supplement: Supp_Table1.pdf [file Supp_Table1.pdf]

## Supplementary Data

SUPPLEMENTARY TABLE S1. INCIDENCE AND NUMBERS OF CASES OF THE FOLLICULAR VARIANT OF PAPILLARY THYROID CANCER (MORPHOLOGY CODE 8340) COMPARED TO THE PAPILLARY AND FOLLICULAR GROUPS WITHOUT 8340 OVER STUDY PERIOD, 1980–2009

| <i>Year of diagnosis</i> | <i>Follicular variant of papillary</i> |              | <i>Follicular without 8340</i> |              | <i>Papillary without 8340</i> |              |
|--------------------------|----------------------------------------|--------------|--------------------------------|--------------|-------------------------------|--------------|
|                          | <i>IR</i>                              | <i>Count</i> | <i>IR</i>                      | <i>Count</i> | <i>IR</i>                     | <i>Count</i> |
| 1980                     | 0.87                                   | 180          | 0.90                           | 172          | 2.01                          | 410          |
| 1981                     | 0.88                                   | 184          | 0.76                           | 152          | 2.28                          | 478          |
| 1982                     | 0.87                                   | 180          | 0.75                           | 144          | 2.46                          | 511          |
| 1983                     | 0.72                                   | 157          | 0.91                           | 183          | 2.62                          | 557          |
| 1984                     | 0.67                                   | 145          | 0.79                           | 162          | 2.87                          | 621          |
| 1985                     | 0.73                                   | 161          | 0.85                           | 173          | 2.98                          | 649          |
| 1986                     | 0.76                                   | 165          | 0.84                           | 177          | 3.23                          | 701          |
| 1987                     | 0.69                                   | 154          | 0.90                           | 190          | 2.99                          | 665          |
| 1988                     | 0.71                                   | 164          | 0.82                           | 179          | 2.90                          | 656          |
| 1989                     | 0.78                                   | 177          | 0.88                           | 193          | 3.25                          | 748          |
| 1990                     | 0.94                                   | 214          | 0.76                           | 168          | 3.36                          | 772          |
| 1991                     | 0.93                                   | 215          | 0.73                           | 162          | 3.27                          | 780          |
| 1992                     | 1.11                                   | 268          | 0.83                           | 194          | 3.39                          | 821          |
| 1993                     | 1.10                                   | 264          | 0.82                           | 195          | 3.22                          | 792          |
| 1994                     | 1.37                                   | 337          | 0.85                           | 205          | 3.47                          | 858          |
| 1995                     | 1.50                                   | 374          | 0.74                           | 181          | 3.57                          | 905          |
| 1996                     | 1.52                                   | 389          | 0.90                           | 224          | 3.67                          | 940          |
| 1997                     | 1.59                                   | 407          | 0.77                           | 193          | 3.94                          | 1019         |
| 1998                     | 1.78                                   | 465          | 0.80                           | 206          | 3.95                          | 1038         |
| 1999                     | 1.85                                   | 486          | 0.82                           | 213          | 4.14                          | 1098         |
| 2000                     | 1.95                                   | 520          | 0.79                           | 209          | 4.44                          | 1190         |
| 2001                     | 2.13                                   | 577          | 0.83                           | 221          | 4.80                          | 1304         |
| 2002                     | 2.40                                   | 654          | 0.84                           | 228          | 5.43                          | 1490         |
| 2003                     | 2.36                                   | 651          | 0.93                           | 254          | 5.73                          | 1577         |
| 2004                     | 2.60                                   | 723          | 0.98                           | 269          | 5.92                          | 1654         |
| 2005                     | 2.72                                   | 767          | 1.07                           | 301          | 6.47                          | 1826         |
| 2006                     | 2.23                                   | 644          | 1.10                           | 315          | 7.30                          | 2098         |
| 2007                     | 2.83                                   | 826          | 1.02                           | 295          | 7.83                          | 2271         |
| 2008                     | 2.88                                   | 847          | 1.08                           | 316          | 8.43                          | 2475         |
| 2009                     | 3.20                                   | 951          | 1.14                           | 336          | 9.33                          | 2765         |

Rates are per 100,000 and are age-adjusted to the 2000 U.S. standard population.
